# Supplementary material for: Assessment of locomotive syndrome among older individuals: a confirmatory factor analysis of the 25-question Geriatric Locomotive Function Scale
Source: PeerJ. 2020 Apr 14;8:e9026. doi: 10.7717/peerj.9026 (PMC7164427; doi:10.7717/peerj.9026)
Supplement: Supplemental Information 2 [file peerj-08-9026-s002.xlsx]

## Sheet: Sheet1
Supplementary TABLE. 2: Sample correlation matrix of the 25-question Geriatric Locomotive Function Scale (GLFS-25), n of participants = 500.
	Q1	Q2	Q3	Q4	Q5	Q6	Q7	Q8	Q9	Q10	Q11	Q12	Q13	Q14	Q15	Q16	Q17	Q18	Q19	Q20	Q21	Q22	Q23	Q24	Q25	Age
Q1	1
Q2	0.48	1
Q3	0.34	0.45	1
Q4	0.43	0.57	0.61	1
Q5	0.31	0.4	0.45	0.63	1
Q6	0.31	0.37	0.5	0.58	0.64	1
Q7	0.32	0.42	0.52	0.66	0.62	0.7	1
Q8	0.4	0.37	0.34	0.47	0.57	0.6	0.57	1
Q9	0.25	0.38	0.45	0.56	0.63	0.67	0.69	0.66	1
Q10	0.25	0.42	0.42	0.53	0.59	0.61	0.65	0.59	0.72	1
Q11	0.39	0.36	0.41	0.61	0.64	0.61	0.61	0.67	0.7	0.62	1
Q12	0.3	0.36	0.54	0.59	0.55	0.67	0.7	0.49	0.65	0.56	0.52	1
Q13	0.24	0.43	0.54	0.64	0.55	0.59	0.67	0.4	0.58	0.53	0.51	0.76	1
Q14	0.34	0.38	0.37	0.57	0.64	0.59	0.67	0.63	0.71	0.67	0.7	0.61	0.58	1
Q15	0.18	0.25	0.36	0.47	0.39	0.43	0.5	0.26	0.39	0.35	0.4	0.56	0.64	0.45	1
Q16	0.28	0.41	0.44	0.58	0.55	0.57	0.69	0.49	0.56	0.57	0.56	0.64	0.71	0.7	0.63	1
Q17	0.3	0.37	0.34	0.49	0.47	0.47	0.54	0.45	0.46	0.44	0.47	0.51	0.61	0.54	0.57	0.67	1
Q18	0.27	0.38	0.4	0.6	0.54	0.55	0.62	0.44	0.53	0.54	0.55	0.62	0.67	0.66	0.62	0.78	0.66	1
Q19	0.32	0.4	0.37	0.61	0.55	0.57	0.66	0.5	0.56	0.58	0.6	0.59	0.62	0.71	0.52	0.72	0.67	0.72	1
Q20	0.36	0.42	0.41	0.62	0.59	0.56	0.61	0.53	0.55	0.52	0.62	0.62	0.65	0.67	0.57	0.69	0.75	0.72	0.78	1
Q21	0.2	0.35	0.47	0.62	0.49	0.48	0.55	0.4	0.53	0.46	0.5	0.6	0.74	0.55	0.62	0.63	0.61	0.69	0.6	0.68	1
Q22	0.24	0.26	0.25	0.41	0.32	0.29	0.39	0.31	0.35	0.37	0.4	0.36	0.44	0.47	0.37	0.5	0.46	0.6	0.52	0.51	0.51	1
Q23	0.2	0.27	0.31	0.42	0.29	0.27	0.38	0.26	0.3	0.34	0.31	0.36	0.47	0.36	0.41	0.45	0.44	0.54	0.46	0.5	0.58	0.66	1
Q24	0.2	0.32	0.38	0.5	0.45	0.53	0.58	0.44	0.49	0.48	0.5	0.58	0.62	0.55	0.48	0.64	0.59	0.61	0.58	0.62	0.58	0.46	0.46	1
Q25	0.24	0.39	0.54	0.58	0.5	0.51	0.56	0.45	0.48	0.43	0.44	0.61	0.65	0.5	0.46	0.56	0.52	0.55	0.52	0.58	0.6	0.4	0.42	0.66	1
Age	0.04	0.08	0.16	0.19	0.19	0.26	0.3	0.22	0.24	0.2	0.15	0.35	0.31	0.23	0.28	0.26	0.22	0.27	0.22	0.18	0.21	0.06	0.13	0.25	0.23	1
